# Supplementary material for: RAD51AP2 is required for efficient meiotic recombination between X and Y chromosomes
Source: PubMed Central journal article supplement — Sci Adv. 2022 Jan 12;8(2):eabk1789. doi: 10.1126/sciadv.abk1789 (PMC8754306; doi:10.1126/sciadv.abk1789), 2022-01-12
Supplement: sciadv.abk1789_sm.pdf [file sciadv.abk1789_sm.pdf]

Supplementary Materials for

**RAD51AP2 is required for efficient meiotic recombination between X and Y chromosomes**

Hui Ma, Tao Li, Xuefeng Xie, Long Jiang, Jingwei Ye, Chenjia Gong, Hanwei Jiang, Suixing Fan, Huan Zhang, Baolu Shi, Beibei Zhang, Xiaohua Jiang, Yang Li, Jianteng Zhou, Jianze Xu, Xingxia Zhang, Xiaoning Hou, Hao Yin\*, Yuanwei Zhang\*, Qinghua Shi\*

\*Corresponding author. Email: qshi@ustc.edu.cn (Q.S.); zyuanwei@ustc.edu.cn (Y.Z.); yh213@ustc.edu.cn (H.Y.).

Published 12 January 2022, *Sci. Adv.* **8**, eabk1789 (2022)

DOI: 10.1126/sciadv.abk1789

**This PDF file includes:**

Figs. S1 to S16

Tables S1 to S3

# Supplementary Figure 1

**A**

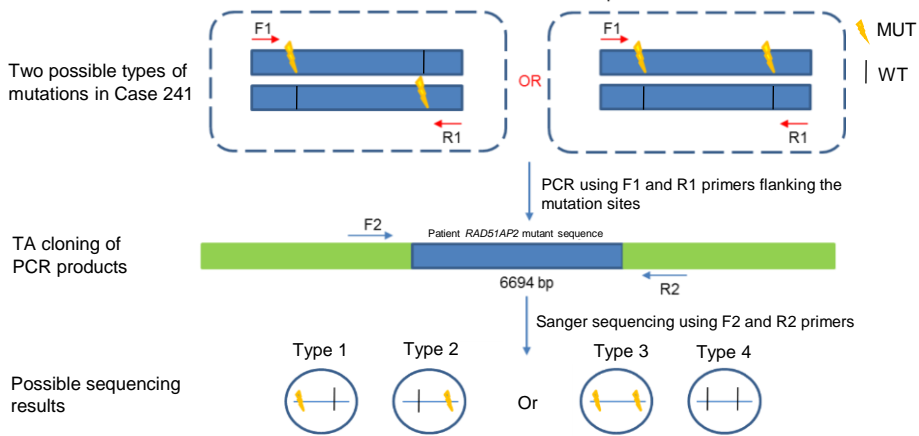

**B**

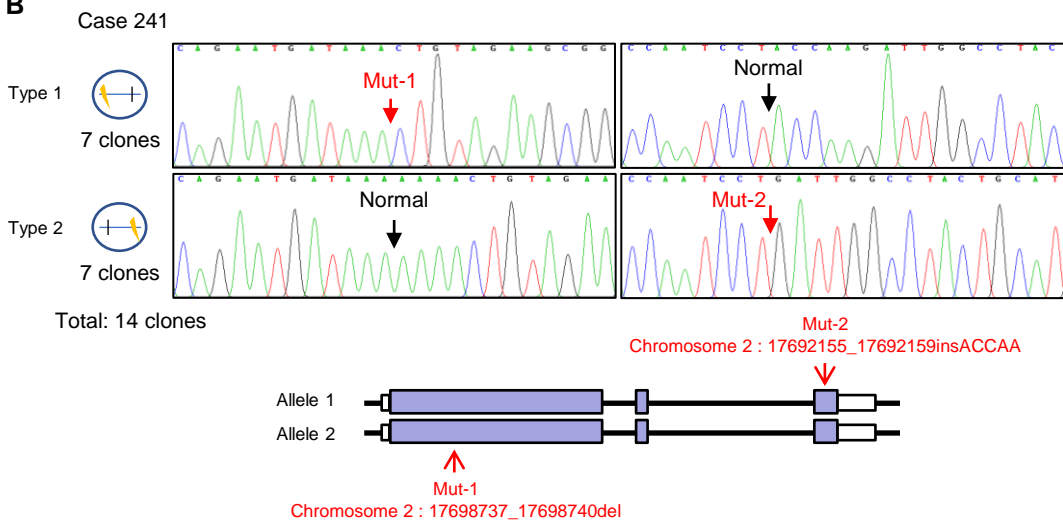

**C**

Case 5809

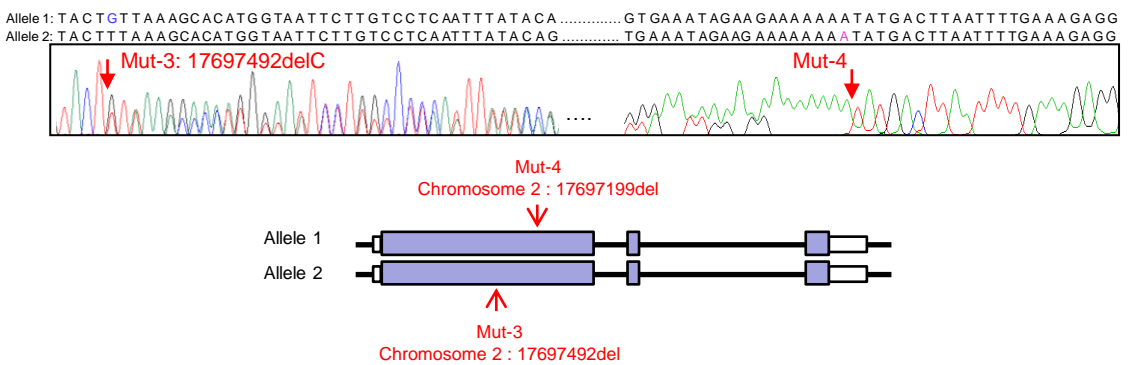

**Fig. S1. Patients have compound heterozygous *RAD51AP2* mutations.** (A) Schematic diagram showing the TA cloning of the mutations identified in Case 241. PCR using primers flanking the two mutation sites of *RAD51AP2* was conducted with genomic DNA (gDNA) from blood samples of the case and PCR products (6694 kb) were inserted into T vectors, followed by Sanger sequencing of colonies. The sequencing results could be one of these two combinations: in one combination, each plasmid contains only one mutation (type 1 and type 2), indicating that the two mutations lie on different chromosomes; In the other combination, one plasmid contains no mutation and one plasmid contains two mutations (type 3 and type 4), indicating that the two mutations lie on the same chromosome. (B) Representative Sanger sequencing chromatograms of the *RAD51AP2* mutations sites in T vectors inserted with the PCR products from Case 241. Sanger sequencing results of a total of 14 clones: 7 clones only contained the *RAD51AP2* mutation c. 943-946delTTTT (type 1) and the other 7 clones only contained the mutation c.3391-3395insTTGGT (type 2). Red arrows indicate mutation sites and black arrows indicate sites containing no mutations. (C) A representative Sanger sequencing chromatogram of the *RAD51AP2* mutations in genomic DNA of blood samples from Case 5809. Purple boxes indicate the exons. Red arrows indicate the mutation sites.

## Supplementary Figure 2

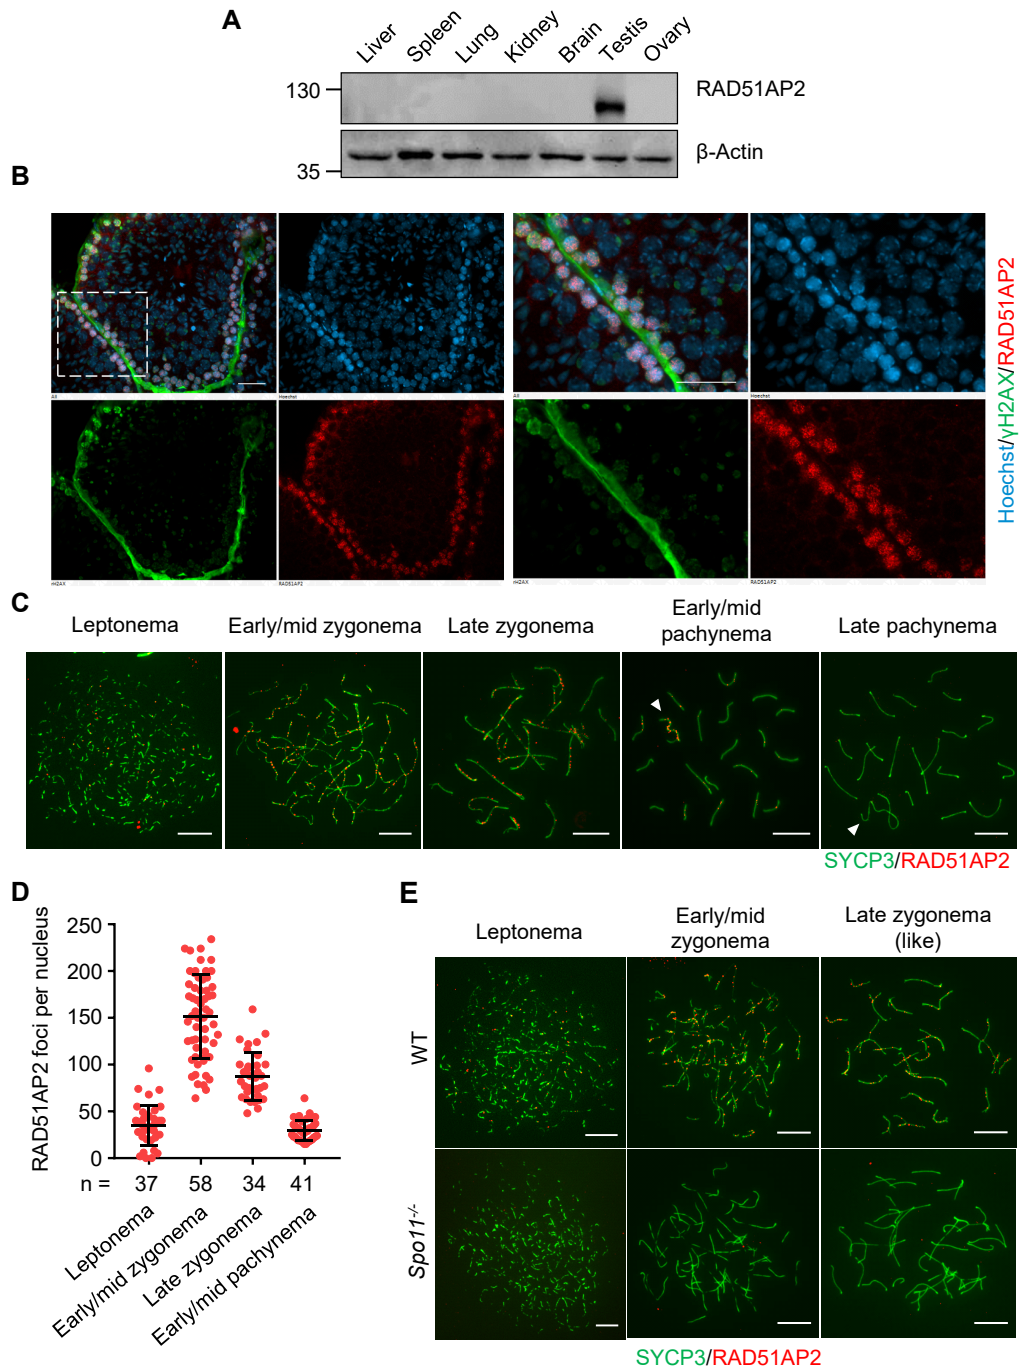

### Supplementary Figure 3

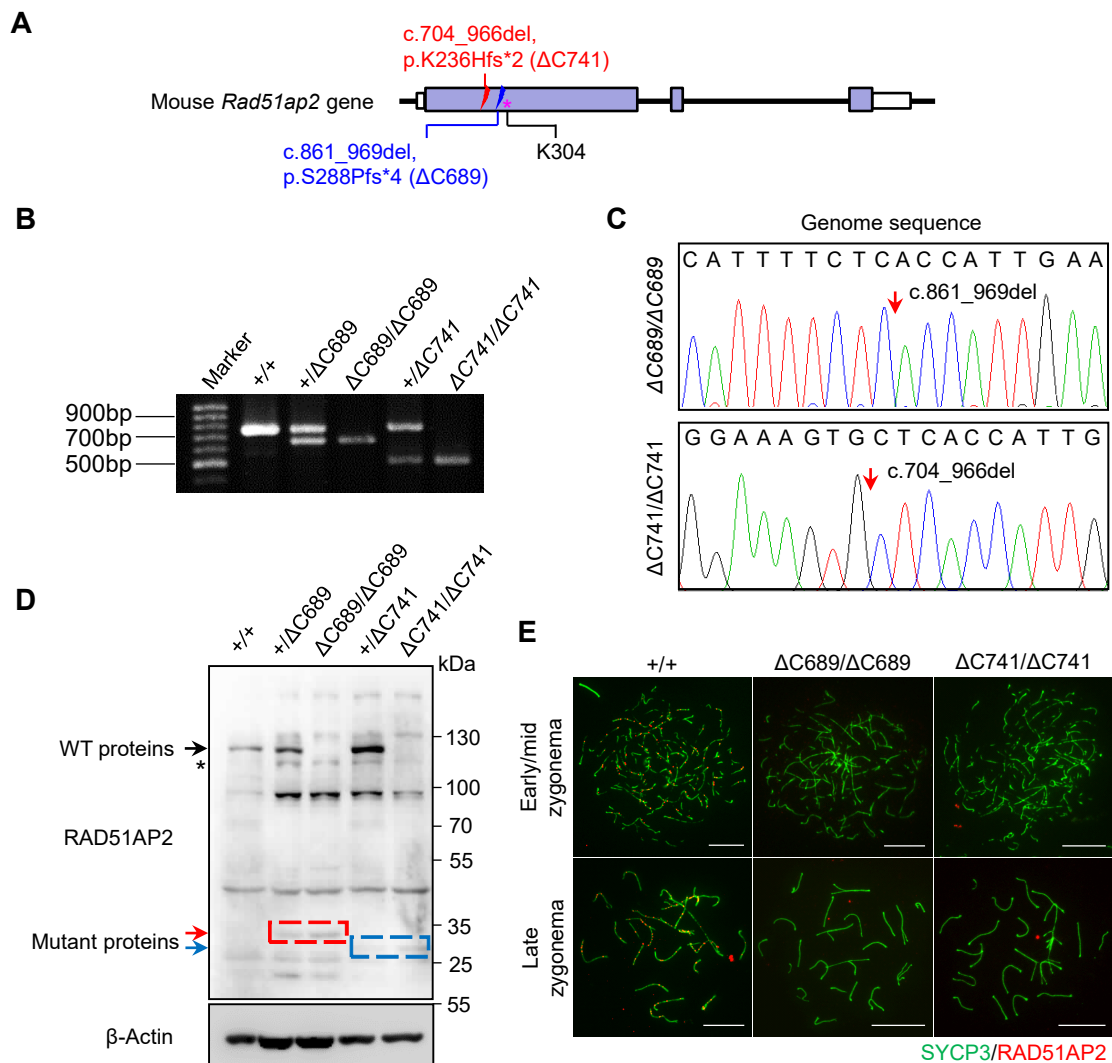

**Fig. S3. Generation of *Rad51ap2* mutant mice.** (A) Diagram of the mouse *Rad51ap2* locus showing the mutation sites in the two *Rad51ap2* mutant lines. The lightning signs indicate the mutation sites in the two lines. The mutation site, corresponding to the Mut-1 in case 241, is indicated by the pink asterisk. (B, C) The mutations in the two *Rad51ap2* mutant mouse lines were confirmed by PCR (B) and Sanger sequencing (C) of the genomic DNAs. Arrows indicate the mutation sites. (D) Detection of the RAD51AP2 proteins in testes from the *Rad51ap2* mutant mouse lines.  $\beta$ -Actin was used as the loading control. Arrows, bands corresponding to the WT or truncating RAD51AP2 proteins. Asterisk, a non-specific band. (E) Representative spread spermatocytes from the WT and *Rad51ap2* mutant mice stained for RAD51AP2 (red) and SYCP3 (green). Scale bars, 10  $\mu$ m.

# Supplementary Figure 4

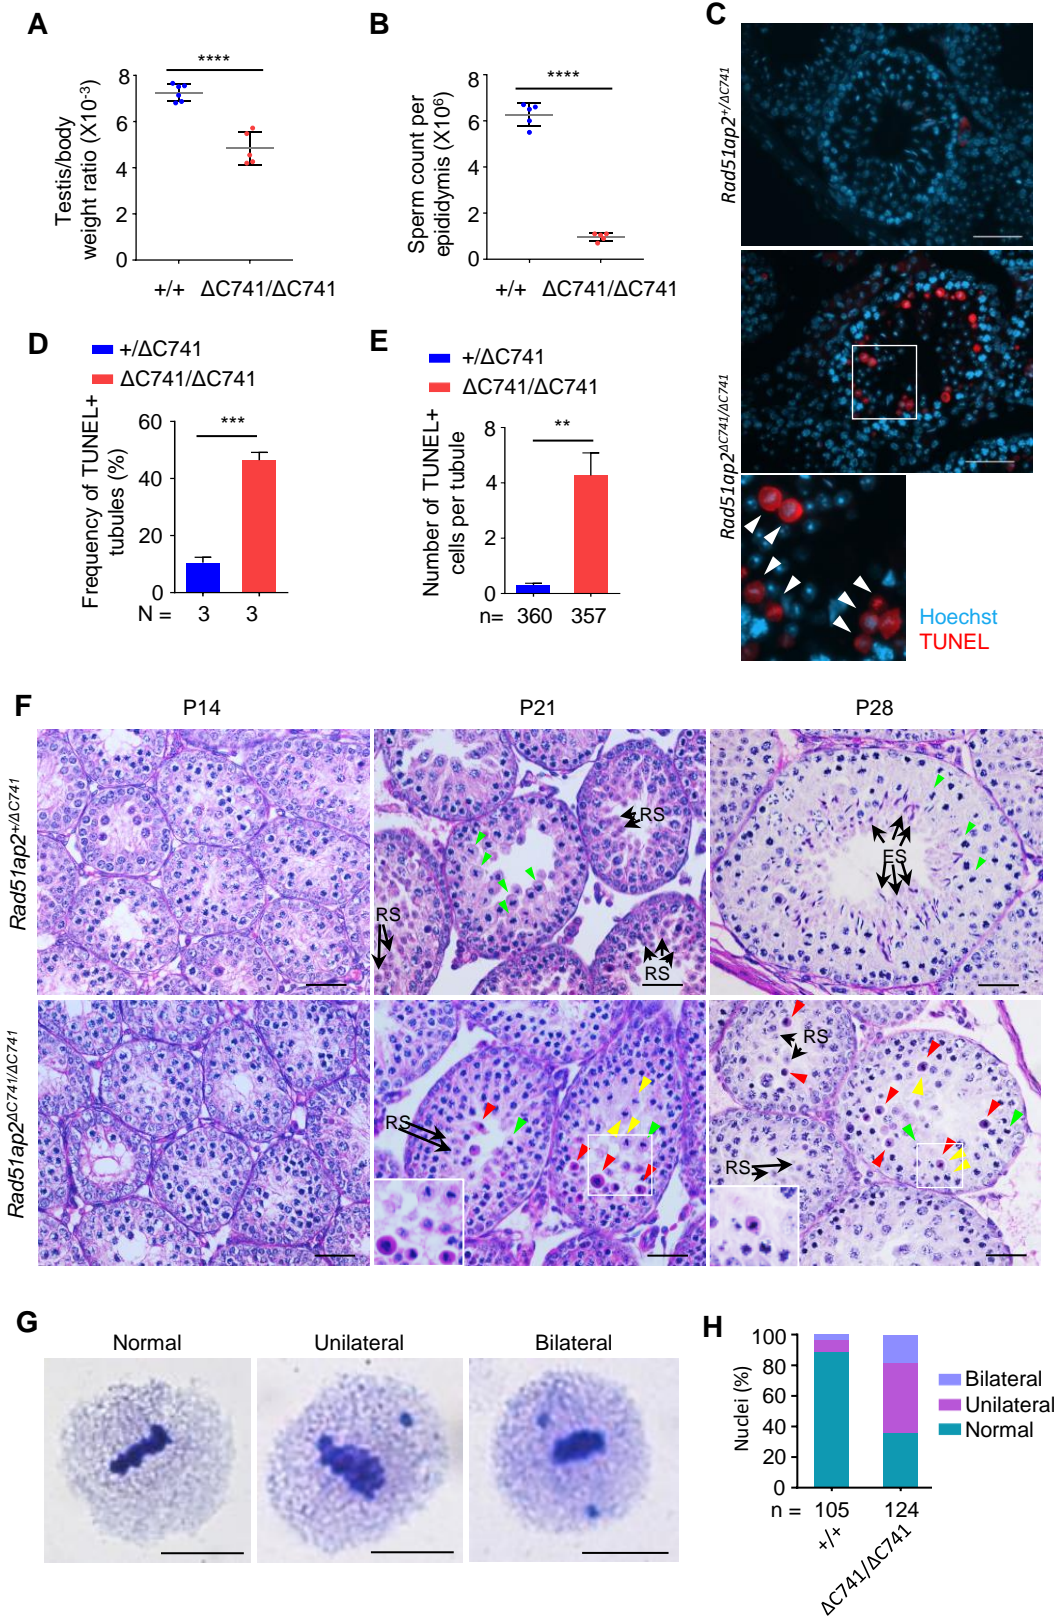

**Fig. S4. Impaired spermatogenesis in *Rad51ap2* mutant mice.** (A-B) Ratios of testis weight to body weight (A) and sperm count per epididymis (B) in 6-week-old WT and *Rad51ap2* mutant mice. Each dot represents the result from one mouse. \*\*\*\* $P < 0.0001$ ; two-tailed Student's *t*-test. (C) Representative testicular sections stained for TUNEL (red). Hoechst 33342 (blue) labeled DNA. A magnified view of the box area is shown below. White arrowheads indicate apoptotic cells in metaphase. Scale bars, 50  $\mu\text{m}$ . (D-E) Frequencies of TUNEL<sup>+</sup> tubules (D) and average numbers of TUNEL<sup>+</sup> cells per tubule (E). N, the number of mice scored. n, the number of tubules scored. \*\* $P < 0.01$ , \*\*\* $P < 0.001$ ; two-tailed Student's *t*-test. (F) PAS-stained testicular sections from control and *Rad51ap2* mutant mice at postnatal days (dpp) 14, 21 and 28. Green arrowheads indicate normal metaphase spermatocytes, red arrowheads indicate apoptotic meiotic metaphase I (MMI) spermatocytes, and yellow arrowheads indicate the unaligned chromosomes in MMI. Arrows indicate representative round spermatids (RS) or elongating/ed spermatids (ES). Scale bars, 50  $\mu\text{m}$ . (G) Representative MMI spermatocytes with aligned or unaligned chromosomes. Scale bars, 50  $\mu\text{m}$ . (H) Fractions of MMI spermatocytes with aligned chromosomes, unilateral or bilateral unaligned chromosomes in WT and *Rad51ap2* <sup>$\Delta\text{C741}/\Delta\text{C741}$</sup>  mice. n, the number of cells scored.

## Supplementary Figure 5

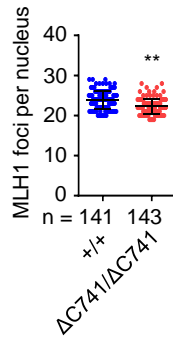

**Fig. S5. Average numbers of MLH1 foci per nucleus.** 141 WT spermatocytes and 143 mutant spermatocytes from three mice per genotype were scored. \*\* $P < 0.01$ ; two-tailed Student's  $t$ -test.



## Supplementary Figure 6

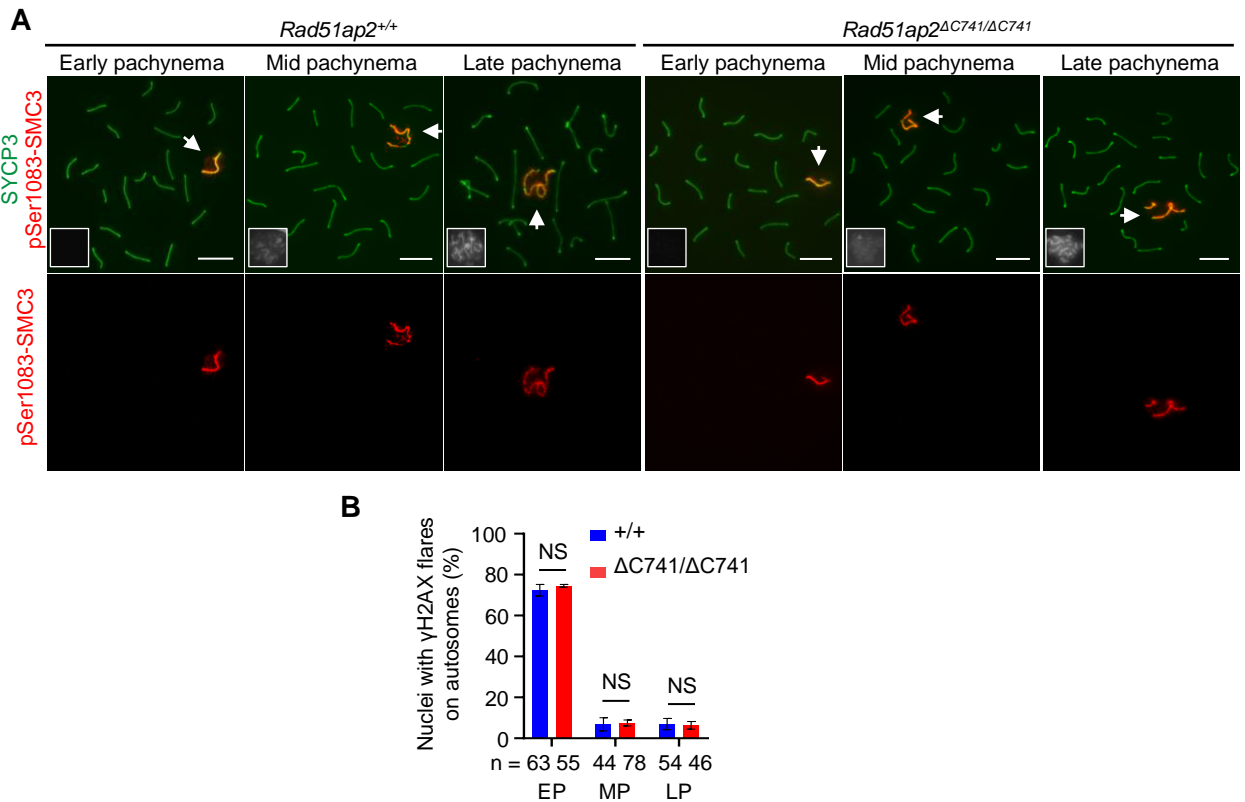

**Fig. S6. No synapsis defects on autosomes were observed in *Rad51ap2* mutant spermatocytes.** (A) Representative spread spermatocytes stained for SYCP3 (green), pSer1083-SMC3 (red, localizing on unsynapsed chromosomal regions but not with synapsed or desynapsed regions), and H1t (white). Arrows indicate the sex chromosomes. Miniaturized H1t staining (white) images are shown in the left-lower corner of the overlay images. Scale bars, 10  $\mu$ m. (B) Percentages of spermatocytes with  $\gamma$ H2AX flares on autosomes at indicated substages of pachytene as shown in (Fig. S7A). n shows the number of analyzed spermatocytes from two mice per genotype. NS, not significant ( $P > 0.05$ ); Two-way analysis of variance. EP, early pachynema. MP, mid pachynema. LP, late pachynema.

# Supplementary Figure 7

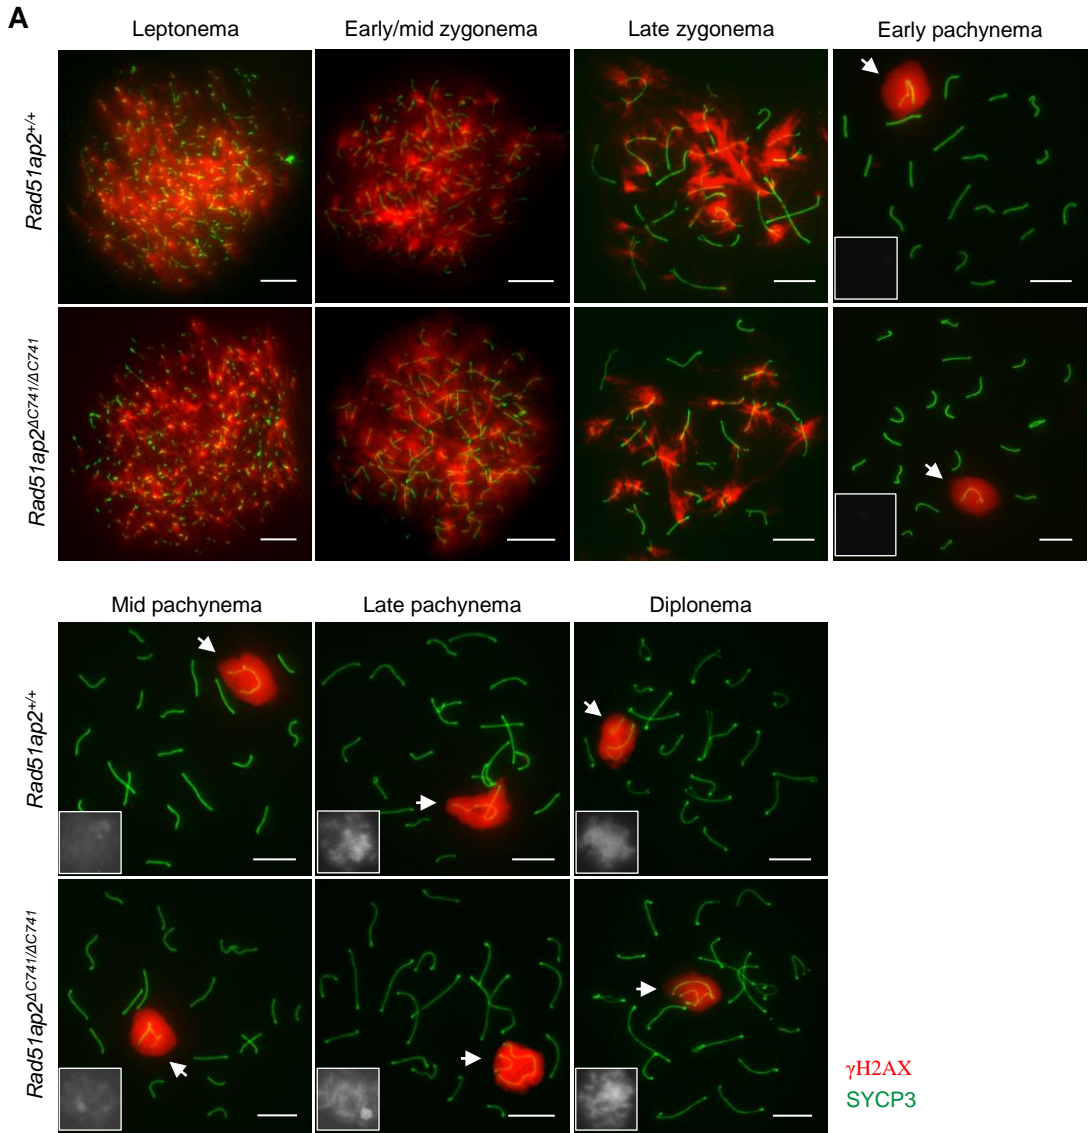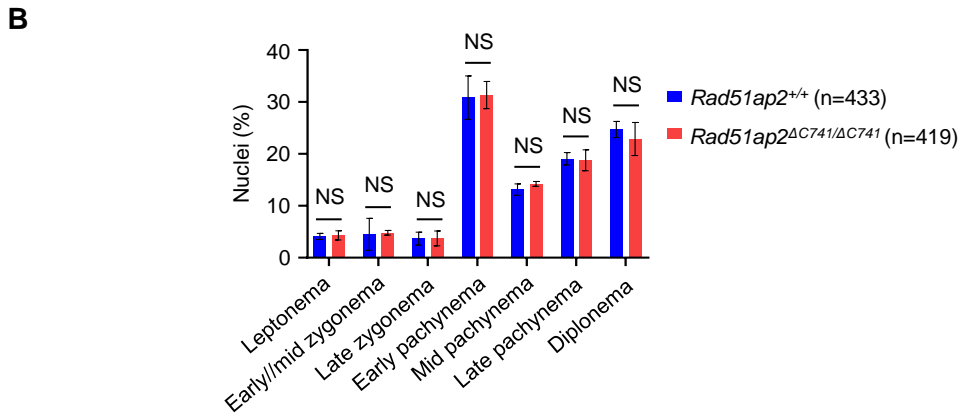

**Fig. S7. Meiotic prophase progression analysis in *Rad51ap2* mutant male mice.** (A) Representative spread spermatocytes from adult WT and *Rad51ap2* mutant mice stained for SYCP3 (green),  $\gamma$ H2AX (red), and H1t (white). Miniaturized H1t staining images are shown in the left-lower corner of the overlay images of the pachytene and diplotene cells. Arrows indicate the sex chromosomes in pachytene and diplotene cells. Scale bars, 10  $\mu$ m. (B) Frequencies of spermatocytes at successive stages of meiotic prophase I as shown in (A). n, the number of spermatocytes scored from at least two mice for each genotype. NS, not significant ( $P>0.05$ ); Chi-square test.

## Supplementary Figure 8

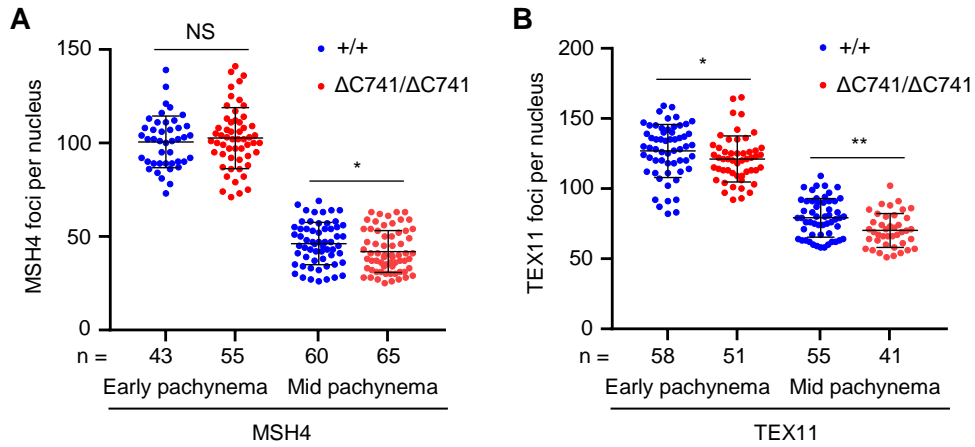

**Fig. S8. Quantification of nucleus-wide MSH4 and TEX11 foci.** The numbers of MSH4 and TEX11 foci per nucleus were counted in spread early and mid pachytene spermatocytes with XY touching. n, the number of spermatocytes scored from at least two mice per genotype. NS, not significant ( $P > 0.05$ ); \* $P < 0.05$ ; \*\* $P < 0.01$ ; Mann-Whitney U test.

## Supplementary Figure 9

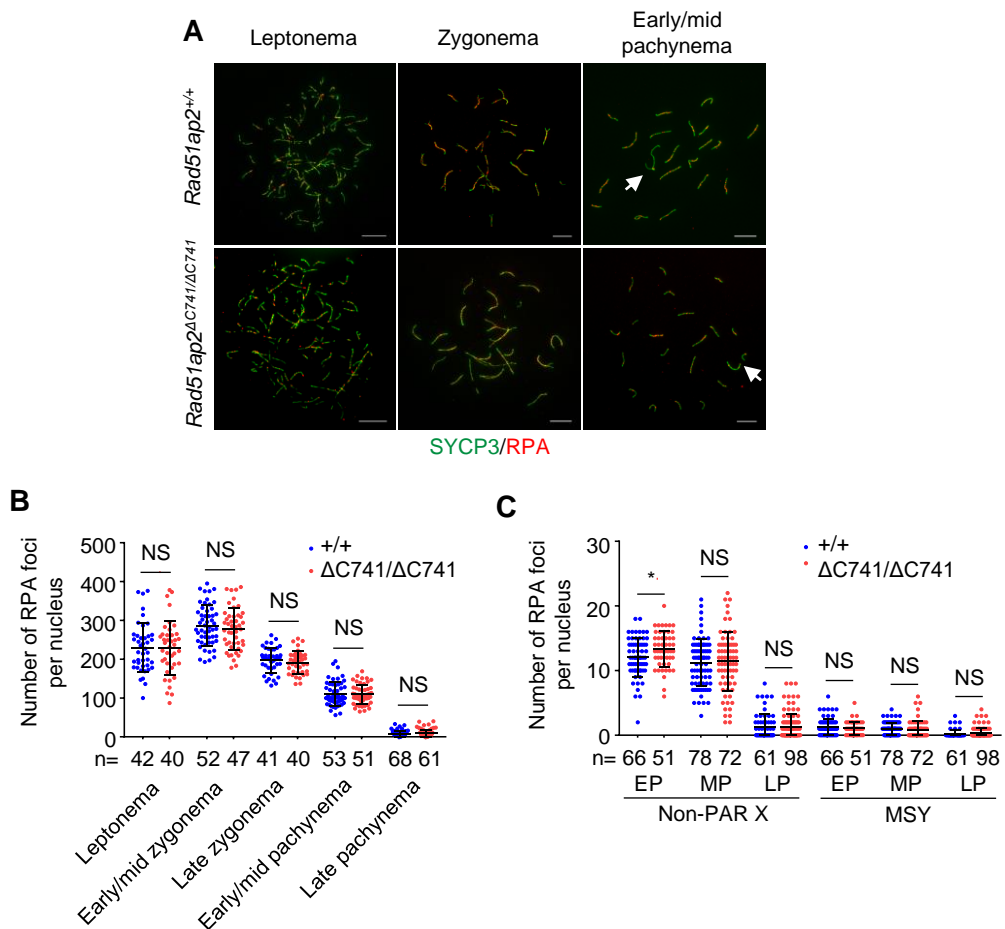

**Fig. S9. Quantification of the dynamic changes of nucleus-wide RPA foci and RPA foci associated with non-PAR regions of the sex chromosomes. (A)** Representative spread spermatocytes stained for SYCP3 (green) and RPA (red). Scale bars, 10  $\mu$ m. **(B)** The numbers of RPA foci numbers in spread leptotene, early/mid zygotene, late zygotene, early/mid pachytene, and late pachytene spermatocytes from WT and *Rad51ap2* mutant mice. **(C)** The numbers of RPA foci on the chromosome axes along the X-specific region of X chromosome (termed as non-PAR X) and the male-specific region of Y chromosome (MSY) in pachytene spermatocytes. For **(B)** and **(C)**, n, the number of spermatocytes scored from at least two mice per genotype. NS, not significant ( $P > 0.05$ ); \* $P < 0.05$ ; Mann-Whitney U test.

## Supplementary Figure 10

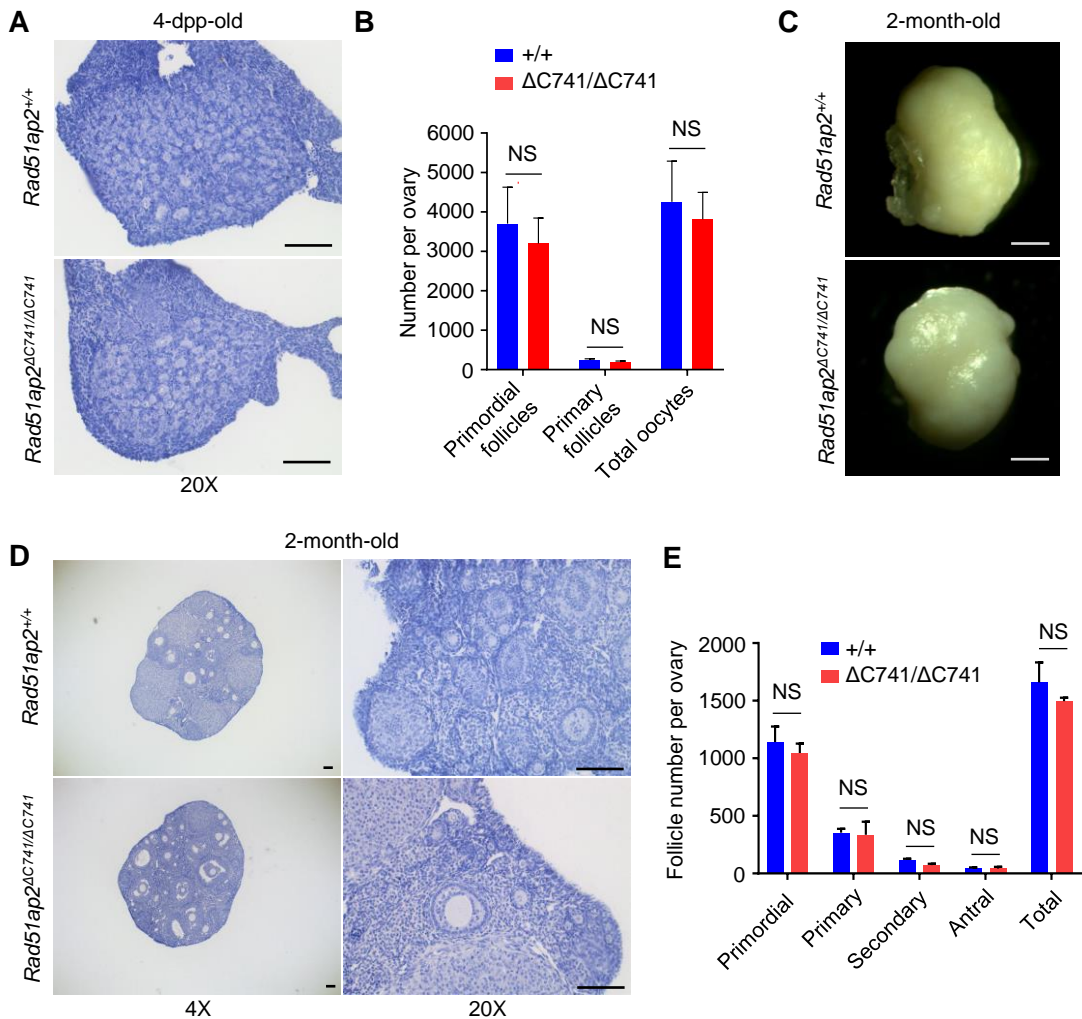

**Fig. S10. Normal follicle development in the ovaries of *Rad51ap2* mutant mice.** (A,D) Haematoxylin staining results showing ovarian histology of 4-dpp-old (A) and 2-month-old (D) WT and *Rad51ap2* mutant mice. Scale bars, 100  $\mu$ m. (B,E) Serial follicle counts and/or total oocyte counts in ovaries 4-dpp-old (B) and 2-month-old (E) WT and *Rad51ap2* mutant mice. Two ovaries from different females for each genotype at each indicated age were analyzed. NS, not significant; Two-way analysis of variance. Scale bars, 100  $\mu$ m. (C) Morphologies of WT and *Rad51ap2* mutant ovaries at 2 months of age. Scale bars, 0.5 mm.

# Supplementary Figure 11

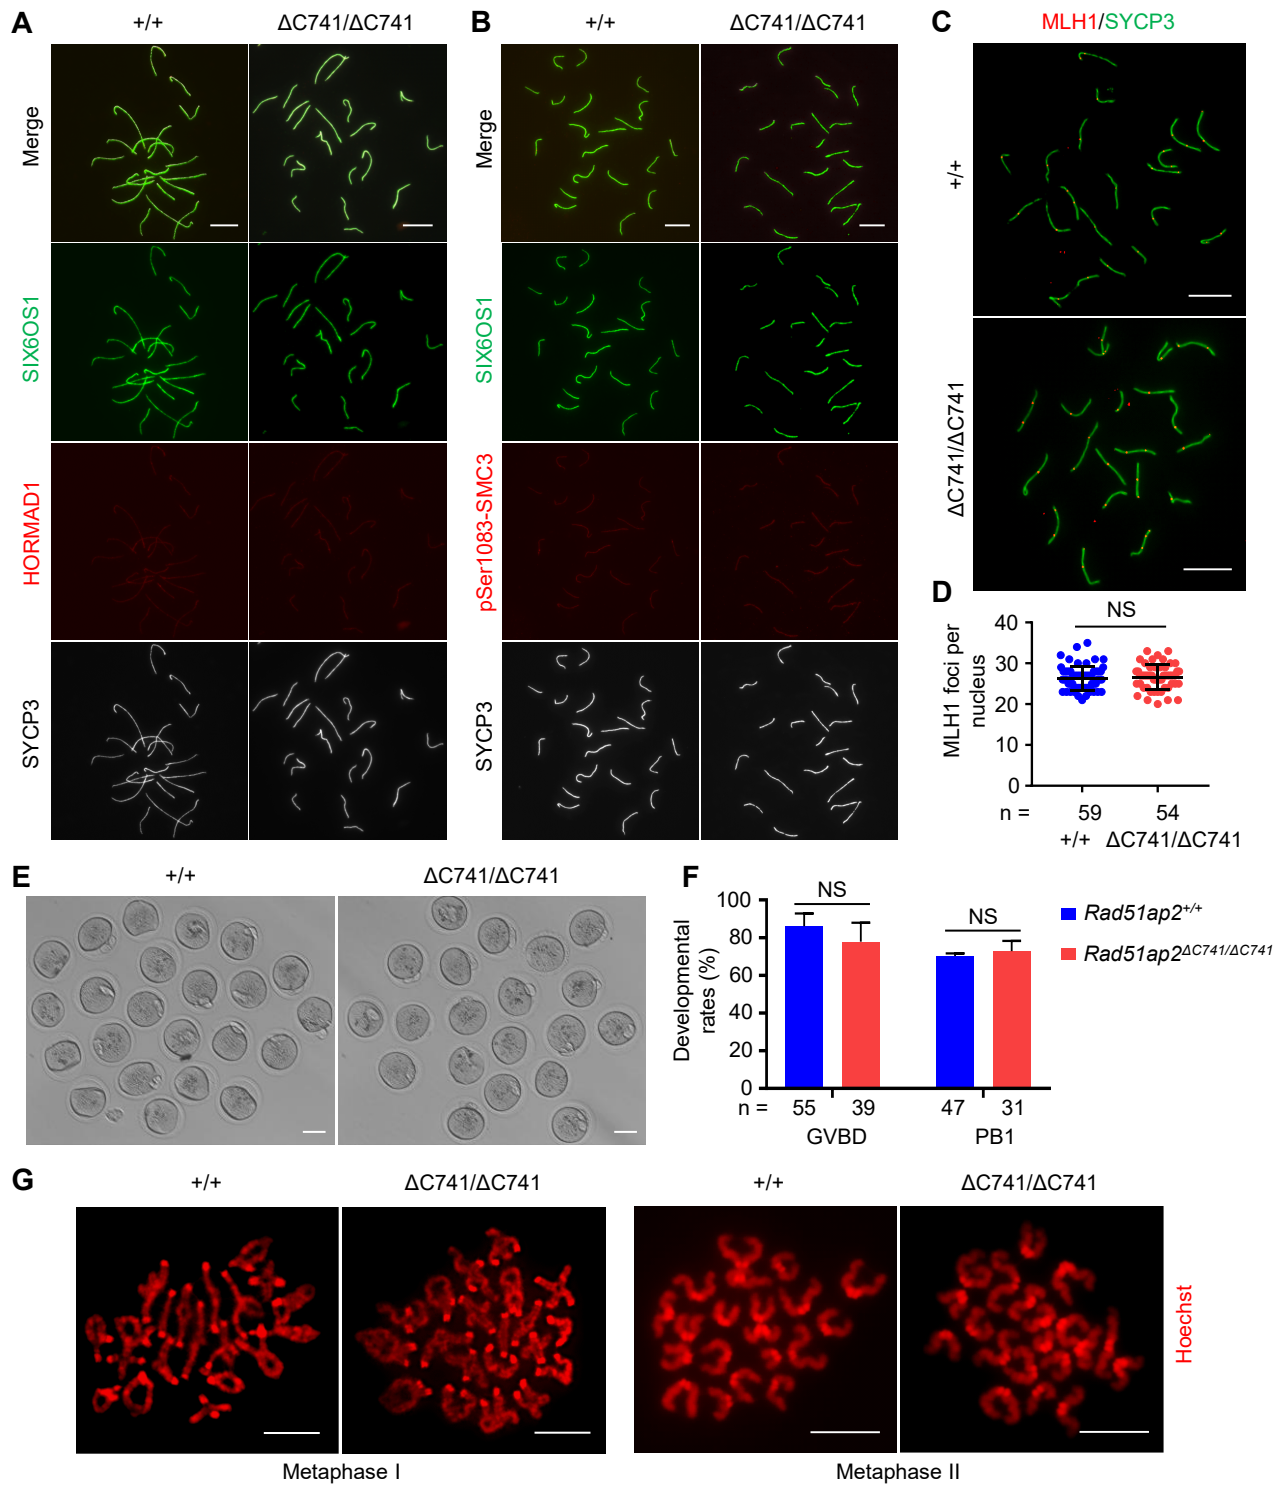

**Fig. S11. No defects in synapsis, recombination, and meiotic maturation were observed in *Rad51ap2* mutant oocytes.** (A,B) Representative spread oocytes from 17.5 days postcoitus (dpc) WT and *Rad51ap2* mutant fetal mice stained for SYCP3 (white) and SIX6OS1 (green), together with HORMAD1 (red, **A**) or pSer1083-SMC3 (red, **B**). Two mice were examined for each genotype. Scale bars, 10  $\mu\text{m}$ . (C) Representative spread oocytes from 17.5 dpc WT and *Rad51ap2* mutant fetal mice stained for SYCP3 (green) and MLH1 (red). Scale bars, 10  $\mu\text{m}$ . (D) Average MLH1 foci per nuclei. n, the number of oocytes scored from two mice per genotype. Student's *t*-test; NS, not significant. (E) Morphology of metaphase II oocytes under differential interference contrast microscopy after 16 hours of *in vitro* maturation culture. Fully grown germinal vesicle-stage oocytes were collected from permanent magnet synchronous generator-primed 3-week-old WT and *Rad51ap2* $\Delta\text{C741}/\Delta\text{C741}$  mice and cultured *in vitro*. Scale bars, 50  $\mu\text{m}$ . (F) The rates of germinal vesicle breakdown (GVBD) at 8 hours of culture and the rates of first polar body (PB1) extrusion at 16 hours of culture. n, the number of oocytes scored from three WT and two *Rad51ap2* $\Delta\text{C741}/\Delta\text{C741}$  mice. NS, not significant; Two-way analysis of variance. (G) Representative images of chromosome spreads made from super-ovulated WT and mutant oocytes after *in vitro* maturation culture for 8 hours for metaphase I oocytes or 16 hours for metaphase II oocytes. DNA were labeled with Hoechst 33342 (red). All the WT (19 cells scored) and *Rad51ap2* mutant (10 cells scored) metaphase I oocytes examined had 20 bivalents, and all the WT (11 cells scored) and *Rad51ap2* mutant (7 cells scored) metaphase II oocytes examined had 20 chromosomes, each with two chromatids. Scale bars, 10  $\mu\text{m}$ .



## Supplementary Figure 12

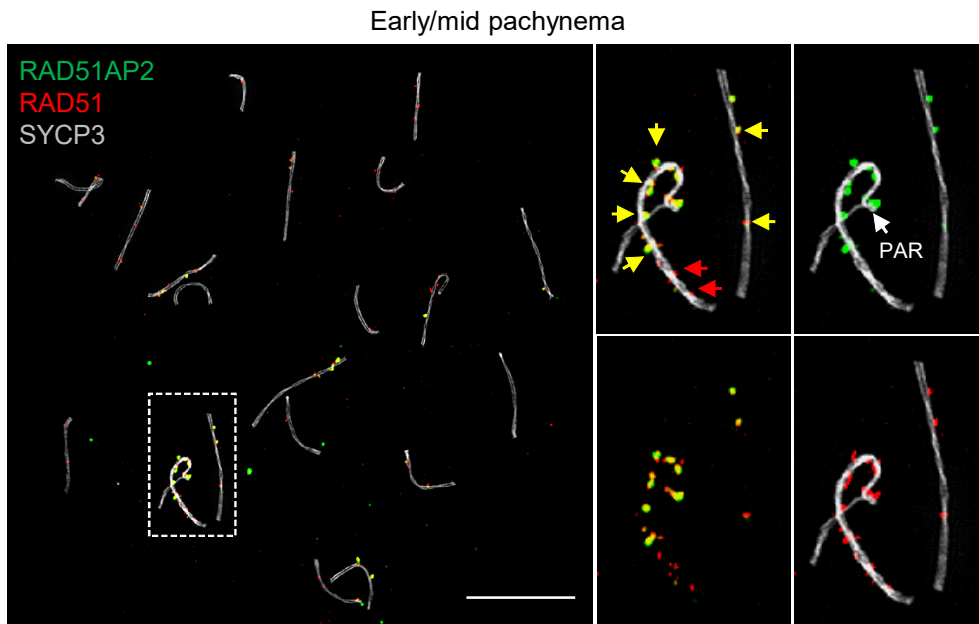

**Fig. S12. Representative image showing co-localization of RAD51AP2 and RAD51 in early/mid pachynema.** Representative images of WT early/mid pachytene spermatocyte nuclei stained for RAD51AP2 (green), RAD51 (red), and SYCP3 (gray) under structured illumination microscopy (SIM). Magnified views of the boxed areas are shown on the right. Yellow arrows indicate representative RAD51AP2 foci co-localizing with RAD51 and red arrows indicate representative RAD51 foci existing alone. The PAR is indicated by a white arrow. Scale bar, 10  $\mu\text{m}$ .

# Supplementary Figure 13

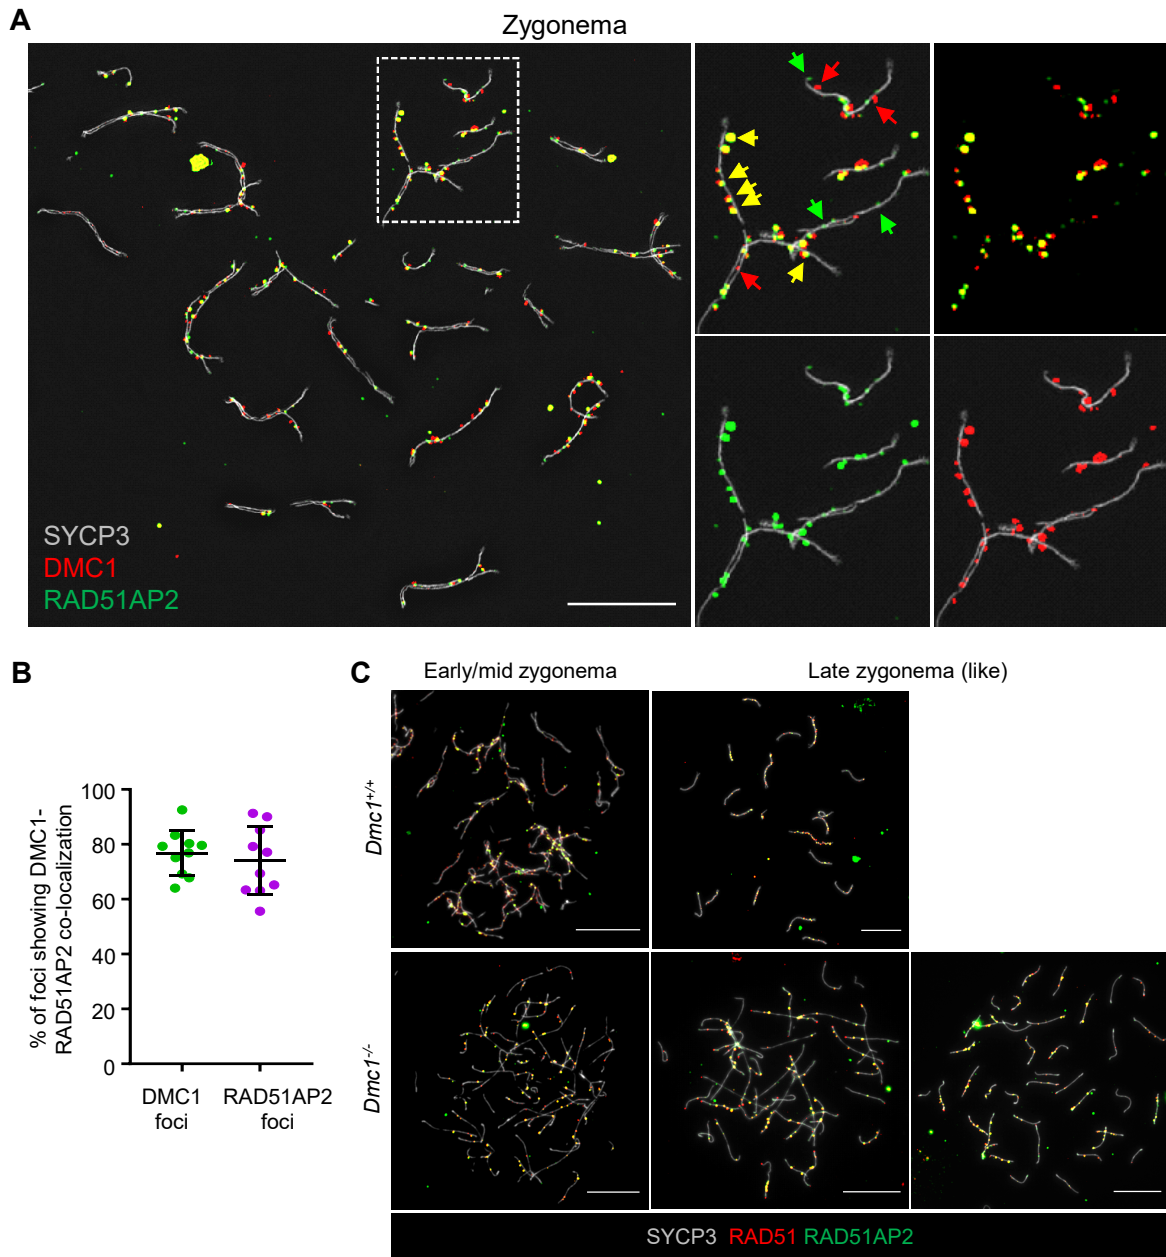

**Fig. S13. RAD51AP2 foci also co-localize with DMC1, but is independent of DMC1.** **(A)** Representative SIM images of WT spread spermatocytes stained for SYCP3 (gray), RAD51AP2 (green) and DMC1 (red) in late zygonema. Magnified views of the boxed areas are shown on the right. Yellow arrows indicate representative RAD51AP2 foci co-localizing with DMC1 (green and red signals overlap), red arrows indicate representative DMC1 foci existing alone, and green arrows indicate representative RAD51AP2 foci existing alone. **(B)** Ratios of DMC1-RAD51AP2 co-localizing foci to the DMC1 or RAD51AP2 total foci in zygotene spermatocytes under SIM. Foci from ten nuclei were quantified with each dot representing the ratio calculated from one nucleus. **(C)** Representative images of *Dmc1*<sup>-/-</sup> spermatocyte nuclei stained for RAD51AP2 (green), RAD51 (red), and SYCP3 (gray) under wide-field microscopy. Scale bar, 10  $\mu$ m.

## Supplementary Figure 14

```
          ****
Homo sapiens SRPIRIGLSRKARIKQLHPYLKQMCYGNLKENF
Pan troglodytes SRPIRIGLSRKARIKQLHPYLKQMCYGNLKENF
Macaca fascicularis SRPIRIGLSRKARIKQLHPYLKQMCYGNLKENF
Rattus norvegicus SRPIRIGLSRKARIKQLHPYLKQMCYGNLKEKF
Equus caballus SRPIRIGLSRKARIKQLHPYLKQMCYGNLKEKF
Ailuropoda melanoleuca SRPIRIGLSRKARVYKQLHPYLKQMSYENLKEDF
Pongo abelii SRPIRVGLSRKAKLKQLHPYLK
Callithrix jacchus SRPIRIGLSRKAKLKQLHPYLK
Macaca mulatta SRPIRIGLSRKAKLKQLHPYLK
Mus musculus SRPIRIGLSRKAKLKQLHPYLK
Canis lupus familiaris SRPIRIGLSRKAKLKQLHPYLQ
Oryctolagus cuniculus SRPIRIGLSRKAKLKQLHPYLK--CYKNFKEDIG
Mesocricetus auratus SRPIRIGLSRKAKPKQLHPYLK
Odobenus rosmarus divergens SRPIRVGLSRRARLKQLHPYLK
Tursiops truncatus SRPIRVGLSRRARLKQLHPYLK
Sus scrofa SRPIRVGLSRRARLKQLHPYLK
```

**Fig. S14. Sequence alignment showing conservation of the RAD51AP2 C-terminus across different mammals.** The alignment was performed using the online software MultAlin (<http://multalin.toulouse.inra.fr/multalin/multalin.html>). The SRPI residues are indicated by the asterisks.

## Supplementary Figure 15

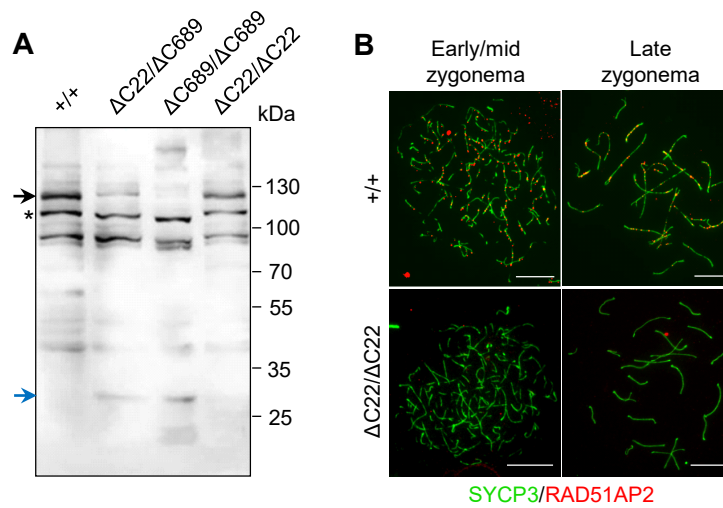

**Fig. S15. The C-terminal 22 amino acids of mouse RAD51AP2 is required for its localization on chromosome axes. (A)** Detection of RAD51AP2 proteins in testes from WT, *Rad51ap2* $\Delta C22/\Delta C689$ , *Rad51ap2* $\Delta C689/\Delta C689$ , and *Rad51ap2* $\Delta SRP1/\Delta SRP1$  mice by Western blotting. Black arrow, the band corresponding to the WT RAD51AP2 proteins (predicted molecular weight, 112.2 kDa) or RAD51AP2  $\Delta C22$  proteins (predicted molecular weight, 109.6 kDa). Blue arrow, the band corresponding to the RAD51AP2  $\Delta C689$  proteins in the mutant mice. Asterisk, a non-specific band. **(B)** Representative spread spermatocytes stained for RAD51AP2 (red) and SYCP3 (green). Scale bars, 10  $\mu$ m.

## Supplementary Figure 16

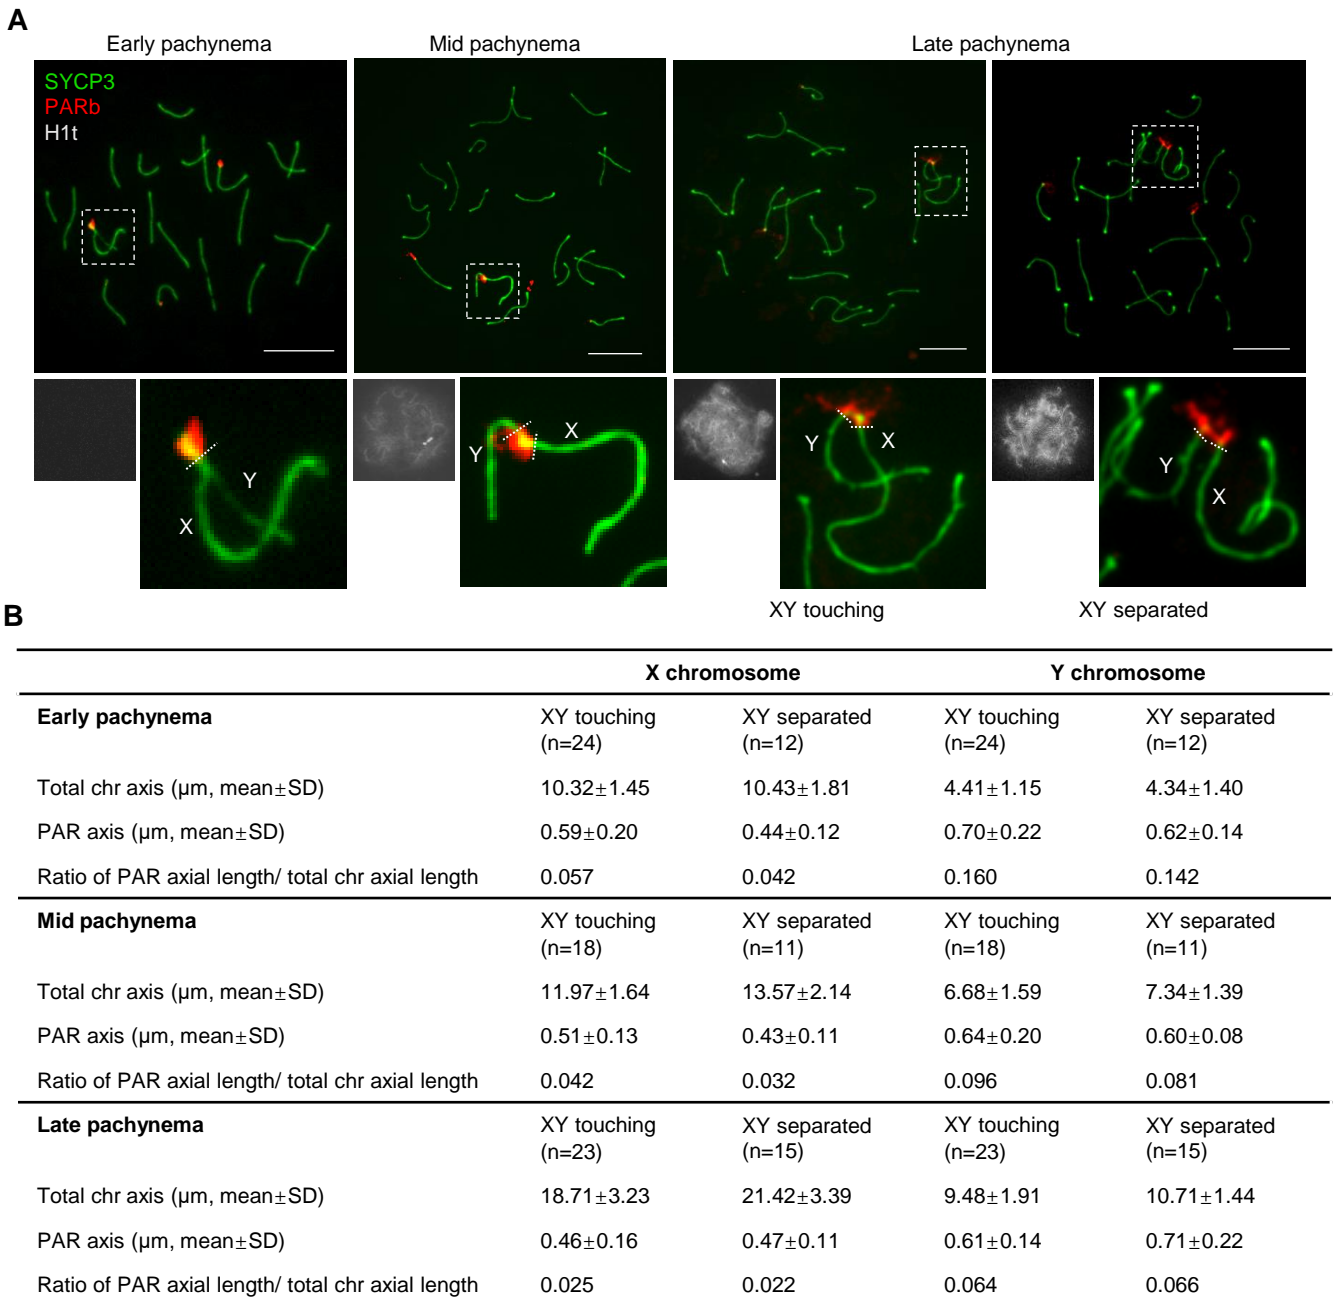

**Fig. S16. Determination of the relative axial length of PARs in early, mid, and late pachynema.**

(A) Representative spread spermatocytes after staining with anti-SYCP3 antibodies (green) and PAR boundary FISH probes (PARb, red) which recognize PAR sequences that border the heterologous parts of X and Y chromosomes. Miniaturized H1t staining (white) image and magnified view of the sex chromosomes are shown below the overlay image. The axial length of PAR is measured from the axial tip to the PARb signals indicated by the dash line. Scale bars, 10  $\mu\text{m}$ . (B) The ratios of the average PAR axial length to the average axial lengths of X and Y chromosomes in early, mid, and late pachynema. n, the number of nuclei scored.

**Table S1. Clinical characteristics and biallelic *RAD51AP2* mutations identified by WES in patients.**

|                                       | Reference values | Case 241              | Case 5809      |                                |
|---------------------------------------|------------------|-----------------------|----------------|--------------------------------|
| Age (yr) <sup>a</sup>                 |                  | 26                    | 34             |                                |
| Height/weight (cm/kg) <sup>a</sup>    |                  | 168/57                | 172/85         |                                |
| Karyotype                             |                  | 46,XY                 | 46,XY          |                                |
| Right testis volume (ml) <sup>b</sup> | >12.5            | 10                    | 12             |                                |
| Left testis volume (ml) <sup>b</sup>  | >12.5            | 10                    | 12             |                                |
| Semen analysis <sup>b</sup>           |                  |                       |                |                                |
| Semen volume (ml)                     | >1.5             | NA                    | 6.87 ± 0.47    |                                |
| Semen pH                              | >7.2             | NA                    | 7.23 ± 0.15    |                                |
| Sperm count (10 <sup>6</sup> /ml)     | >15              | 0                     | 0              |                                |
| Hormone analysis <sup>c</sup>         |                  |                       |                |                                |
| Testosterone (ng/dl)                  | 175-785          | 369.18                | 284.27         |                                |
| Prolactin (ng/ml)                     | 2.58-18.12       | 9.24                  | 6.93           |                                |
| Follicle-stimulating hormone (mIU/ml) | 0.80-5.10        | 2.89                  | 4.53           |                                |
| Luteinizing hormone (mIU/ml)          | 1.24-8.62        | 8.42                  | 3.00           |                                |
| Oestradiol (pg/ml)                    | 20-75            | 41.69                 | 52.91          |                                |
| <i>RAD51AP2</i> mutations             |                  |                       |                |                                |
| Mutation type                         |                  | Compound heterozygous |                | Compound heterozygous          |
| Mutation at cDNA level                |                  | c.943_946del          | c.3391insTTGGT | c.2191_2192del c. 2484_2485del |
| Protein alteration                    |                  | p.K315Lfs*2           | p.R1131Lfs*19  | p.V731Lfs*26 p.K828Nfs*4       |
| Allele frequency in gnomAD            |                  | 4.07X10 <sup>-6</sup> | 0              | 0 3.89X10 <sup>-5</sup>        |
| Allele frequency in ExAC              |                  | 0                     | 0              | 0 5.10X10 <sup>-5</sup>        |
| Allele frequency in the 1000 Genomes  |                  | 0                     | 0              | 0 0                            |
| Allele frequency in ESP6500           |                  | 0                     | 0              | 0 0                            |

<sup>a</sup> Age, height, and weight at sampling. <sup>b</sup> Reference values were published by WHO in 2010. <sup>c</sup> Reference values were suggested by clinical laboratory. NA, not available. Data are presented as mean ± SD for the semen analysis of case

5809. gnomAD, the Genome Aggregation Database. ExAC, the Exome Aggregation Consortium database.  
ESP6500, the exome sequencing project of > 6500 individuals by the National Heart, Lung and Blood Institute.



**Table S2. Information of the primers.**

| Information                                                                      | Name                                        | Sequence                                                |
|----------------------------------------------------------------------------------|---------------------------------------------|---------------------------------------------------------|
| Primers for human gDNA amplification and Sanger sequencing                       | RAD51AP2 gDNA-Mut-1-F                       | AAAGAGGCATATGTTAGGGAT                                   |
|                                                                                  | RAD51AP2 gDNA-Mut-1-R                       | GTGGTCAACAAAATACGTGC                                    |
|                                                                                  | RAD51AP2 gDNA-Mut-2-F                       | GTCTAACGTTACAGTCCCAGT                                   |
|                                                                                  | RAD51AP2 gDNA-Mut-2-R                       | CCTTGCTTTTCTTGACAAACC                                   |
|                                                                                  | RAD51AP2 gDNA-Mut-3/4-F                     | AGTGCATGCTTTATTTGAAG                                    |
|                                                                                  | RAD51AP2 gDNA-Mut-3/4-R                     | AGAAAACATGTCATCCATTG                                    |
| Primers for TA-cloning of gDNA flanking the RAD51AP2-Mut-1 and Mut-2 in Case 241 | Human gDNA amplification-F (F1 in Fig. S1a) | AAAGAGGCATATGTTAGGGAT                                   |
|                                                                                  | Human gDNA amplification-R (R1 in Fig.S1a)  | CCTTGCTTTTCTTGACAAACC                                   |
|                                                                                  | Sanger sequencing (F2 in Fig.S1a)           | AAGTGCCACCTGACGTCTAA                                    |
|                                                                                  | Sanger sequencing (R2 in Fig.S1a)           | GAAGAGCGCCCAATACGCAA                                    |
| Primers for genotyping of the <i>Rad51ap2</i> mutant mice                        | $\Delta$ C689/ $\Delta$ C689-F              | AGCAGAAGTGAGTCATGCTC                                    |
|                                                                                  | $\Delta$ C689/ $\Delta$ C689-R              | TAGATCTGTCCACAGTCCAAG                                   |
|                                                                                  | $\Delta$ C741/ $\Delta$ C741-F              | AGCAGAAGTGAGTCATGCTC                                    |
|                                                                                  | $\Delta$ C741/ $\Delta$ C741-R              | TAGATCTGTCCACAGTCCAAG                                   |
|                                                                                  | $\Delta$ SRPI/ $\Delta$ SRPI-F              | TTGTCTCTTTGCAGGCAGT                                     |
|                                                                                  | $\Delta$ SRPI/ $\Delta$ SRPI-R              | TGAAGCTGTTTCAGCCTAGC                                    |
|                                                                                  | $\Delta$ C22/ $\Delta$ C22-F                | ATGGCAGAGTTGCTTCCCTT                                    |
|                                                                                  | $\Delta$ C22/ $\Delta$ C22-R                | ACAAAATCTGCAGCTGGAGG                                    |
| Primers for constructing plasmids for Co-IP                                      | Flag-RAD51-F                                | GATTACAAAGACGATGACGATAAAAT<br>GGCAATGCAGATGCAGC         |
|                                                                                  | Flag-RAD51-R                                | GATTACAAAGACGATGACGATAAATC<br>AGTCTTTGGCATCTCCCACTCC    |
|                                                                                  | GFP-RAD51AP2-WT-F                           | TCGAGCTCAAGCTTCGAATTCATGTCT<br>CTCCCTCAGCCCAC           |
|                                                                                  | GFP-RAD51AP2-WT-R                           | ATGGTGGCGACCGGTGGATCCCGAAA<br>ATTTTCTTTTAAGTTTCCGTAACAC |
|                                                                                  | GFP- RAD51AP2-Mut-2-F                       | GCATGGACGAGCTGTACAAGATGTCT<br>CTCCCTCAGCCCAC            |
|                                                                                  | GFP- RAD51AP2-Mut-2-R                       | GATCTAGAGTCGCGGCCGCTTCAAAA<br>ATTTTCTTTTAAGT            |

**Table S3. Information of the antibodies.**

| <b>Name of antibodies</b>                     | <b>Host</b> | <b>Company</b>                          | <b>Catalog number or antigens<sup>a</sup></b> | <b>Dilution</b>                      |
|-----------------------------------------------|-------------|-----------------------------------------|-----------------------------------------------|--------------------------------------|
| SYCP3                                         | Mouse       | Abcam                                   | ab97672                                       | IF: 1:200                            |
|                                               | Rabbit      | Novus Biologicals                       | NB300-231                                     | IF: 1:500                            |
| MLH1                                          | Mouse       | BD Pharmingen                           | 551092                                        | IF: 1:50                             |
| $\gamma$ H2AX                                 | Rabbit      | Novus Biologicals                       | NB100-384                                     | IF: 1:5000                           |
|                                               | Mouse       | Millipore                               | 05636                                         | IF: 1:250                            |
| RAD51AP2                                      | Rabbit      | Customizedly produced by ABclonal       | 87-326 aa and 131-320 aa,                     | IF: 1:800<br>WB: 1:4000<br>IF: 1:500 |
|                                               | Rat         | Customizedly produced by ABclonal       | respectively                                  | WB: 1:3000<br>IP: 1:500              |
| RAD51                                         | Rabbit      | Customizedly produced by ABclonal       | 1-92 aa                                       | WB: 1:2000                           |
|                                               | Guinea pig  | Customizedly produced by ABclonal       | 1-92 aa                                       | IF: 1:100<br>IP: 1:500               |
|                                               | Rabbit      | Santa Cruz                              | sc-8349                                       | IF: 1:200                            |
| DMC1                                          | Guinea pig  | Customizedly produced by ABclonal       | 1-100 aa                                      | IF: 1:100                            |
| RPA1                                          | Rabbit      | Gift from Prof. P. Jeremy Wang          | -                                             | IF: 1:100                            |
| H1t                                           | Guinea pig  | Customizedly produced by Dia-An Biotech | 113-209 aa                                    | IF: 1:800                            |
| SIX6OS1                                       | Rabbit      | Customizedly produced by Youke          | 5-268 aa                                      | IF: 1:800                            |
| pSer1083-SMC3                                 | Rabbit      | Bethyl                                  | A304-637A                                     | IF: 1:200                            |
| HORMAD1                                       | Rabbit      | Proteintech                             | 13917-I-AP                                    | IF: 1:500                            |
| MSH4                                          | Rabbit      | Abcam                                   | ab58666                                       | IF: 1:100                            |
| TEX11                                         | Rabbit      | Gift from Prof. P. Jeremy Wang          | -                                             | IF: 1:100                            |
| CREST                                         | Human       | Immunovision                            | HCT-0100                                      | IF: 1:500                            |
| $\beta$ -Actin                                | Rabbit      | Abcam                                   | ab8227                                        | WB: 1:3000                           |
| GFP                                           | Mouse       | Abmart                                  | M20004                                        | WB: 1:3000                           |
|                                               |             |                                         |                                               | IP: 1:500                            |
| Monoclonal anti-Flag                          | Mouse       | Sigma                                   | F1804                                         | WB: 1:2000<br>IP: 1:1000             |
| Normal Rabbit IgG                             | Rabbit      | Cell Signaling Technology               | #2729                                         | IP: 1:500                            |
| Alexa Fluor® 555 Donkey anti-Rabbit IgG (H+L) | Donkey      | Molecular Probes                        | A-31572                                       | IF: 1:200                            |
| Alexa Fluor® 488 Goat anti-Mouse IgG1         | Goat        | Molecular Probes                        | A-21121                                       | IF: 1:100                            |
| Alexa Fluor® 488 Goat anti-Rat IgG (H+L)      | Goat        | Molecular Probes                        | A-11006                                       | IF: 1:100                            |

|                                                 |        |                             |             |             |
|-------------------------------------------------|--------|-----------------------------|-------------|-------------|
| Alexa Fluor® 647 Goat anti-Mouse IgG (H+L)      | Goat   | Molecular Probes            | A-21235     | IF: 1:200   |
| Alexa Fluor® 647 Goat anti-Rabbit IgG (H+L)     | Goat   | Molecular Probes            | A-21244     | IF: 1:200   |
| Alexa Fluor® 647 Goat anti-Guinea Pig IgG (H+L) | Goat   | Molecular Probes            | A-21450     | IF: 1:200   |
| Fluorescein (FITC)-conjugated Affinipure Donkey | -      | Jackson ImmunoResearch Inc. | 706-095-148 | IF: 1:100   |
| HRP Donkey anti-rabbit IgG                      | Donkey | BioLegend, Inc              | 406401      | WB: 1:10000 |
| HRP Goat anti-rat IgG                           | Goat   | BioLegend, Inc              | 405405      | WB: 1:10000 |
| HRP Goat anti-mouse IgG                         | Goat   | BioLegend, Inc              | 405306      | WB: 1:10000 |

<sup>a</sup>antigen information was shown for customizedly produced antibodies, rather than catalog number. IP, immunoprecipitation. WB, Western blotting. IF, immunofluorescence staining.
